# Supplementary material for: The Sec7 N-terminal regulatory domains facilitate membrane-proximal activation of the Arf1 GTPase
Source: eLife journal article supplement (doi:10.7554/elife.12411), 2016-01-14
Supplement: supp [file elife-12411-supp-v1.zip]

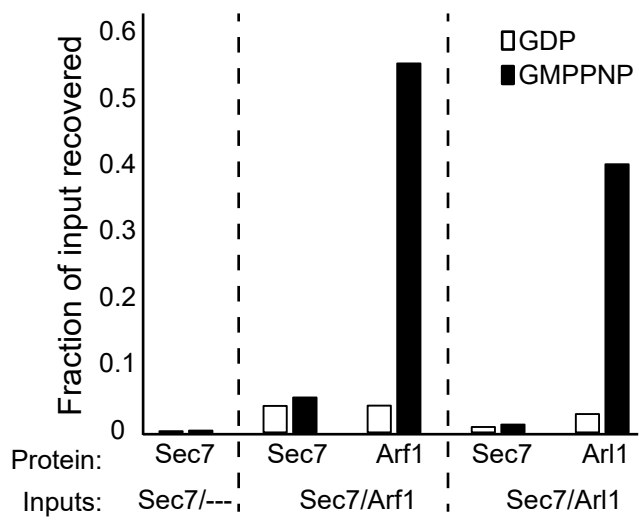

Figure 4 – figure supplement 5:  
Liposome pelleting analysis of Arf1 and  
Arl1 interaction with *S. cerevisiae* Sec7 $\Delta$ C
