# Supplementary figures and images for: The Sec7 N-terminal regulatory domains facilitate membrane-proximal activation of the Arf1 GTPase
Source: eLife journal article supplement (doi:10.7554/elife.12411), 2016-01-14

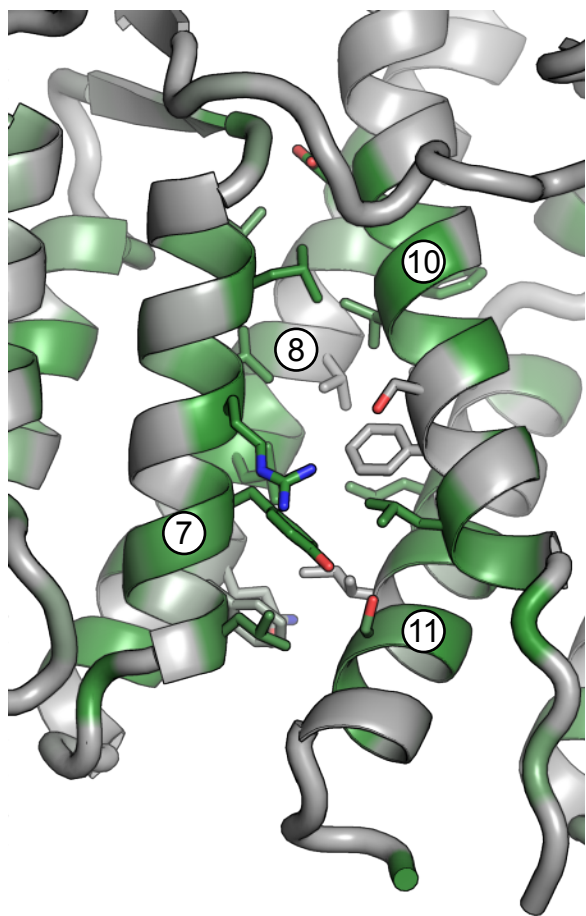

Figure 1 – figure supplement 3:  
Magnified view of the DCB/HUS interface

Supplement: supp [file elife-12411-supp-v1.zip]

chain A @ 1.5 rmsd

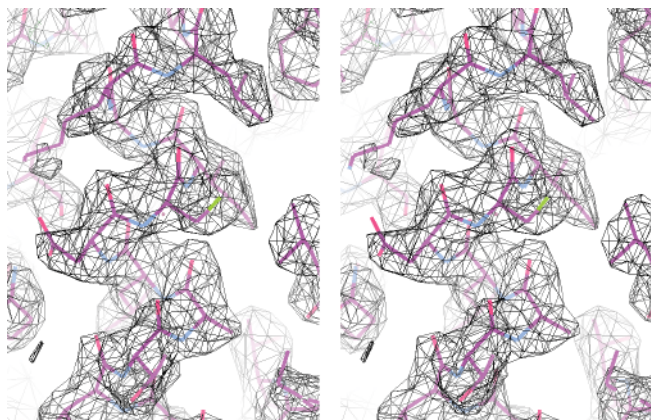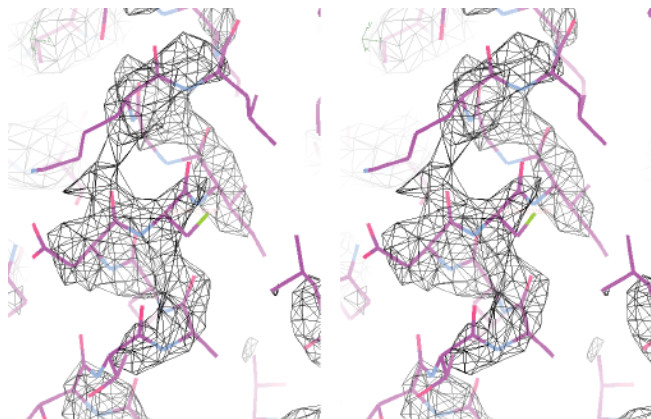

chain D @ 1.5 rmsd

Figure 1 – figure supplement 2:  
Electron density of crystal structure

Supplement: supp [file elife-12411-supp-v1.zip]

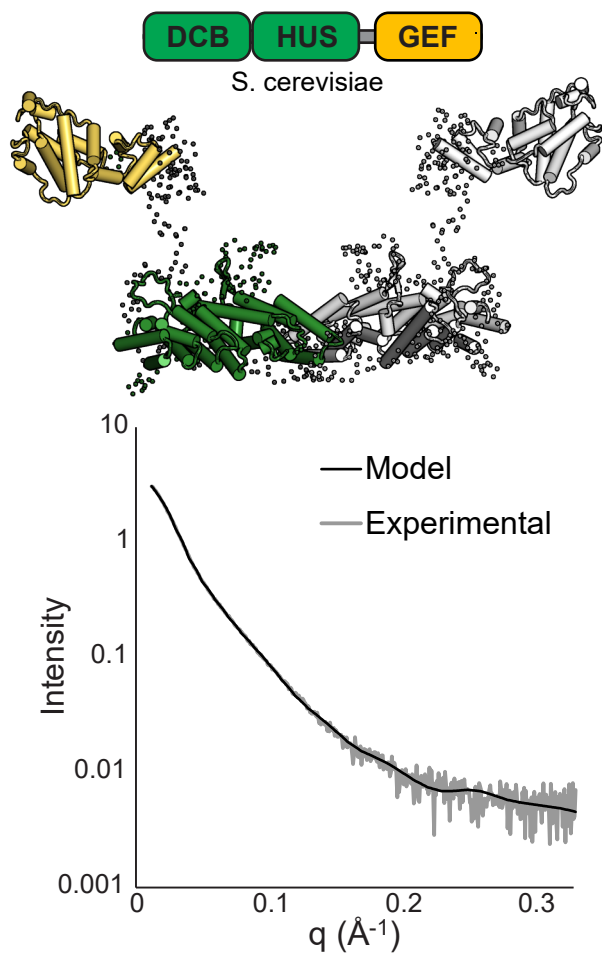

Figure 2 – figure supplement 1:  
SAXS analysis of *S. cerevisiae* Sec7 $\Delta$ C

Supplement: supp [file elife-12411-supp-v1.zip]

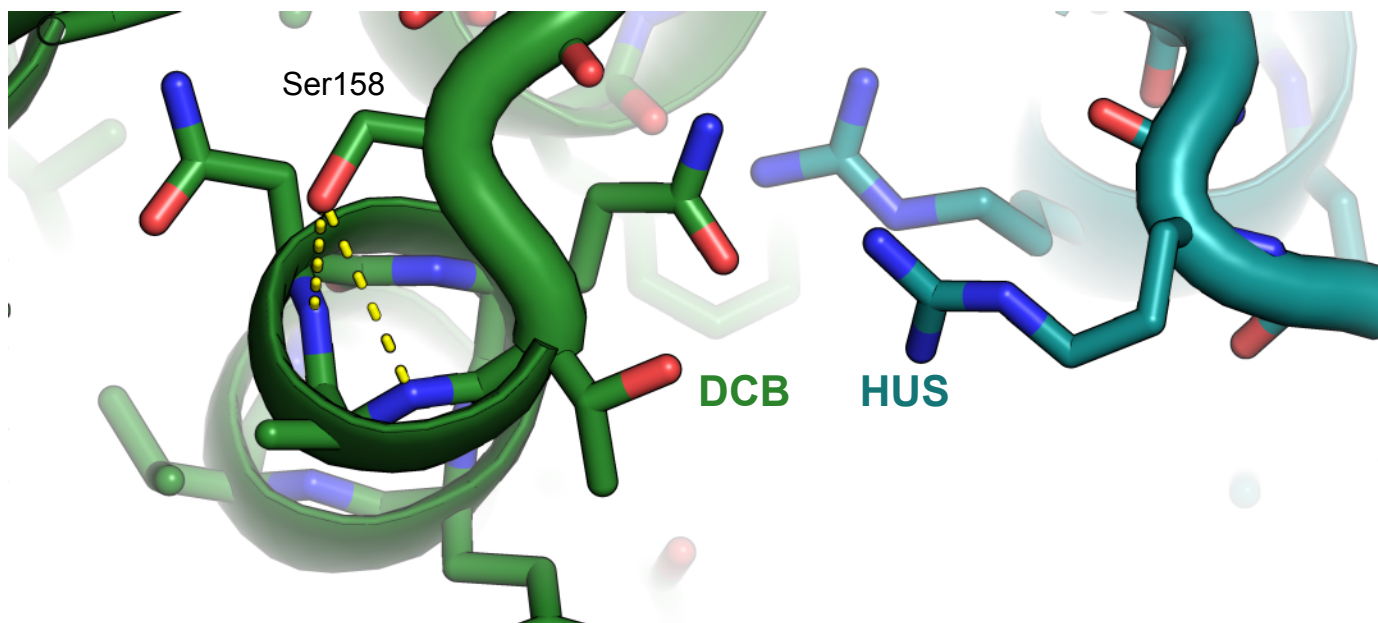

Figure 6 – figure supplement 1: Atomic basis of the *sec7-1* phenotype

Supplement: supp [file elife-12411-supp-v1.zip]

A

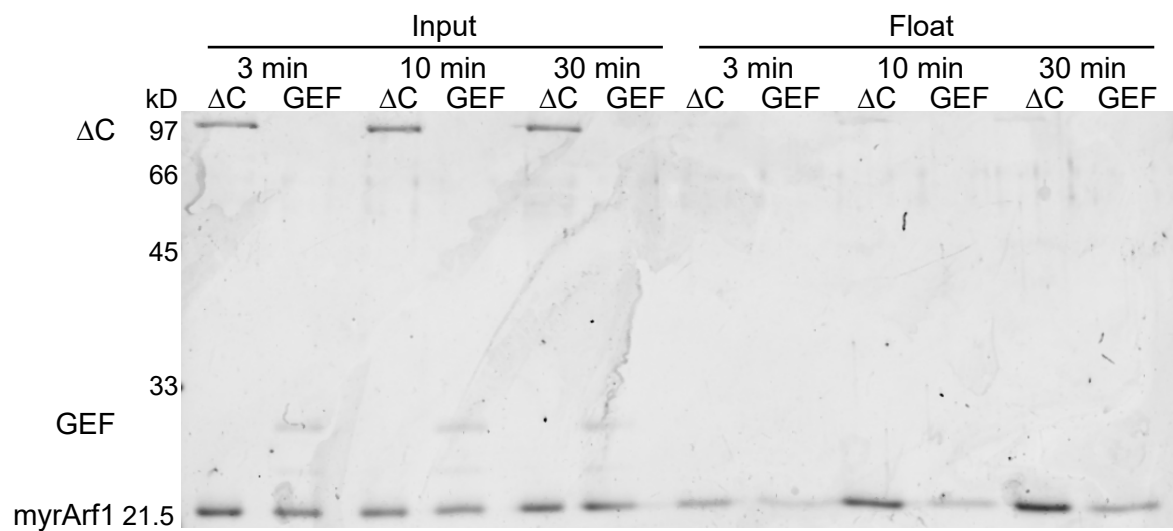

B

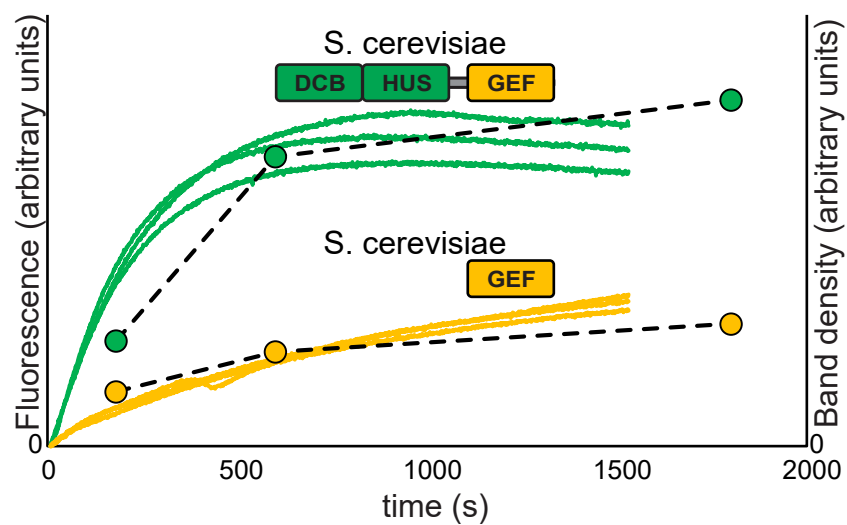

Figure 4 – figure supplement 2:  
Measurement of Sec7 GEF kinetics by liposome flotation

Supplement: supp [file elife-12411-supp-v1.zip]

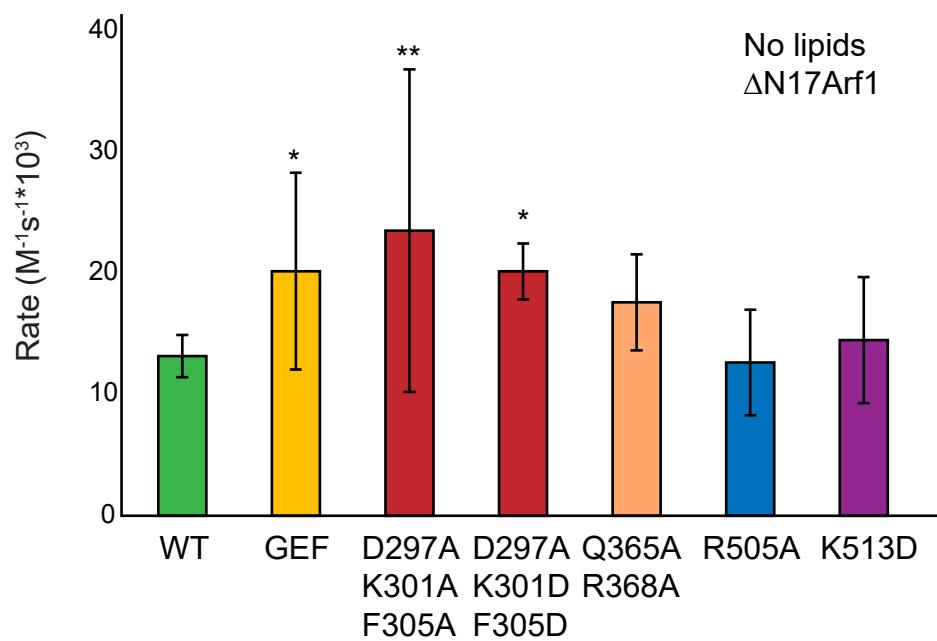

Figure 6 – figure supplement 2: Sec7 $\Delta$ C mutant activity in the absence of membranes

Supplement: supp [file elife-12411-supp-v1.zip]

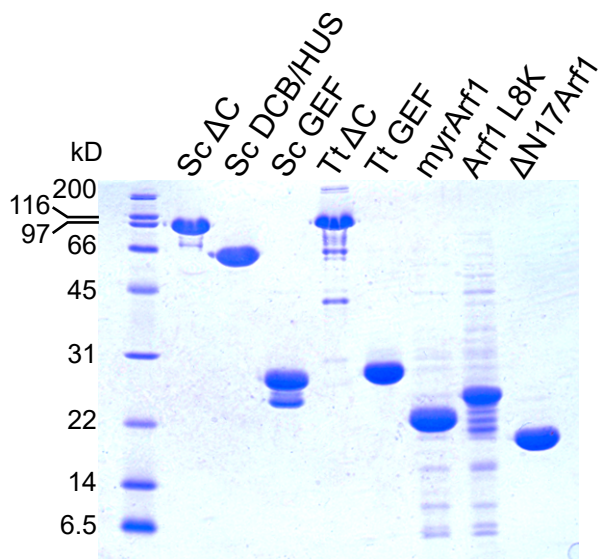

Figure 4 – figure supplement 1:  
Purity of constructs used for kinetic assays

Supplement: supp [file elife-12411-supp-v1.zip]

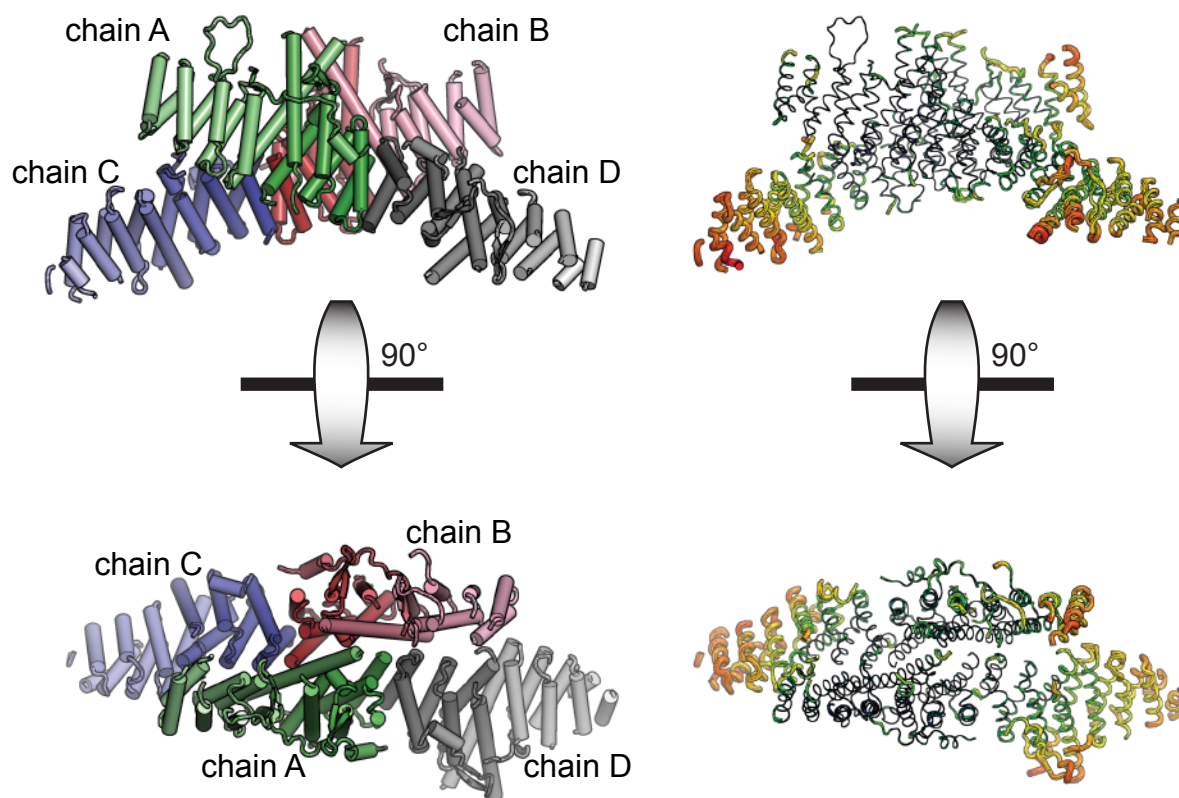

Figure 1 – figure supplement 1: Asymmetric unit of crystal structure

Supplement: supp [file elife-12411-supp-v1.zip]

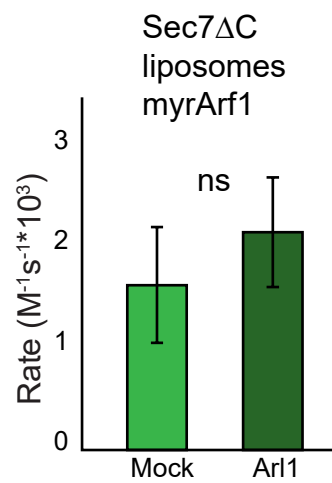

Figure 4– figure supplement 6:  
Effect of Arl1 preincubation on  
Sec7 $\Delta$ C GEF activity

Supplement: supp [file elife-12411-supp-v1.zip]

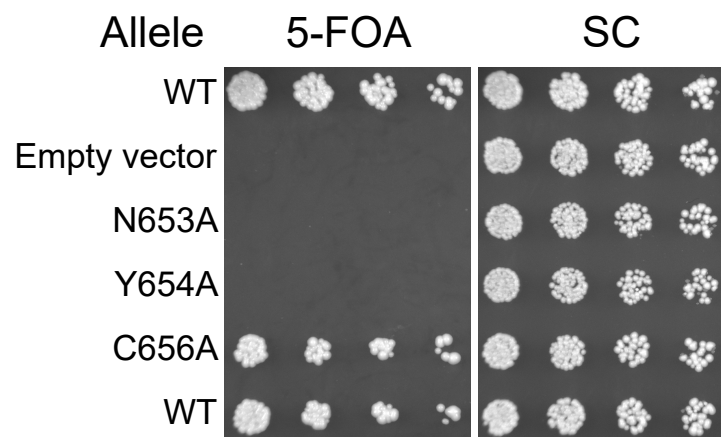

Figure 6 – figure supplement 3:  
Viability of HUS-box mutants in  
the presence of *arf1* $\Delta$ /ARF2

Supplement: supp [file elife-12411-supp-v1.zip]

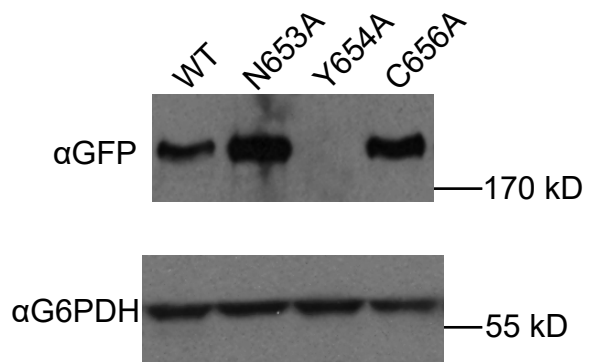

Figure 6 – figure supplement 4:  
Expression of HUS box mutants

Supplement: supp [file elife-12411-supp-v1.zip]

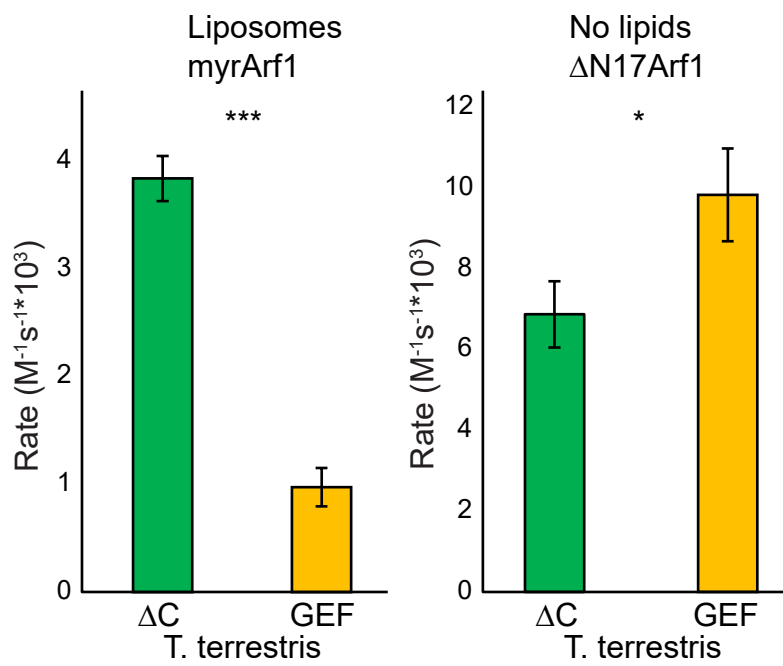

Figure 4 – figure supplement 3:  
GEF activity of *T. terrestris* Sec7 constructs

Supplement: supp [file elife-12411-supp-v1.zip]

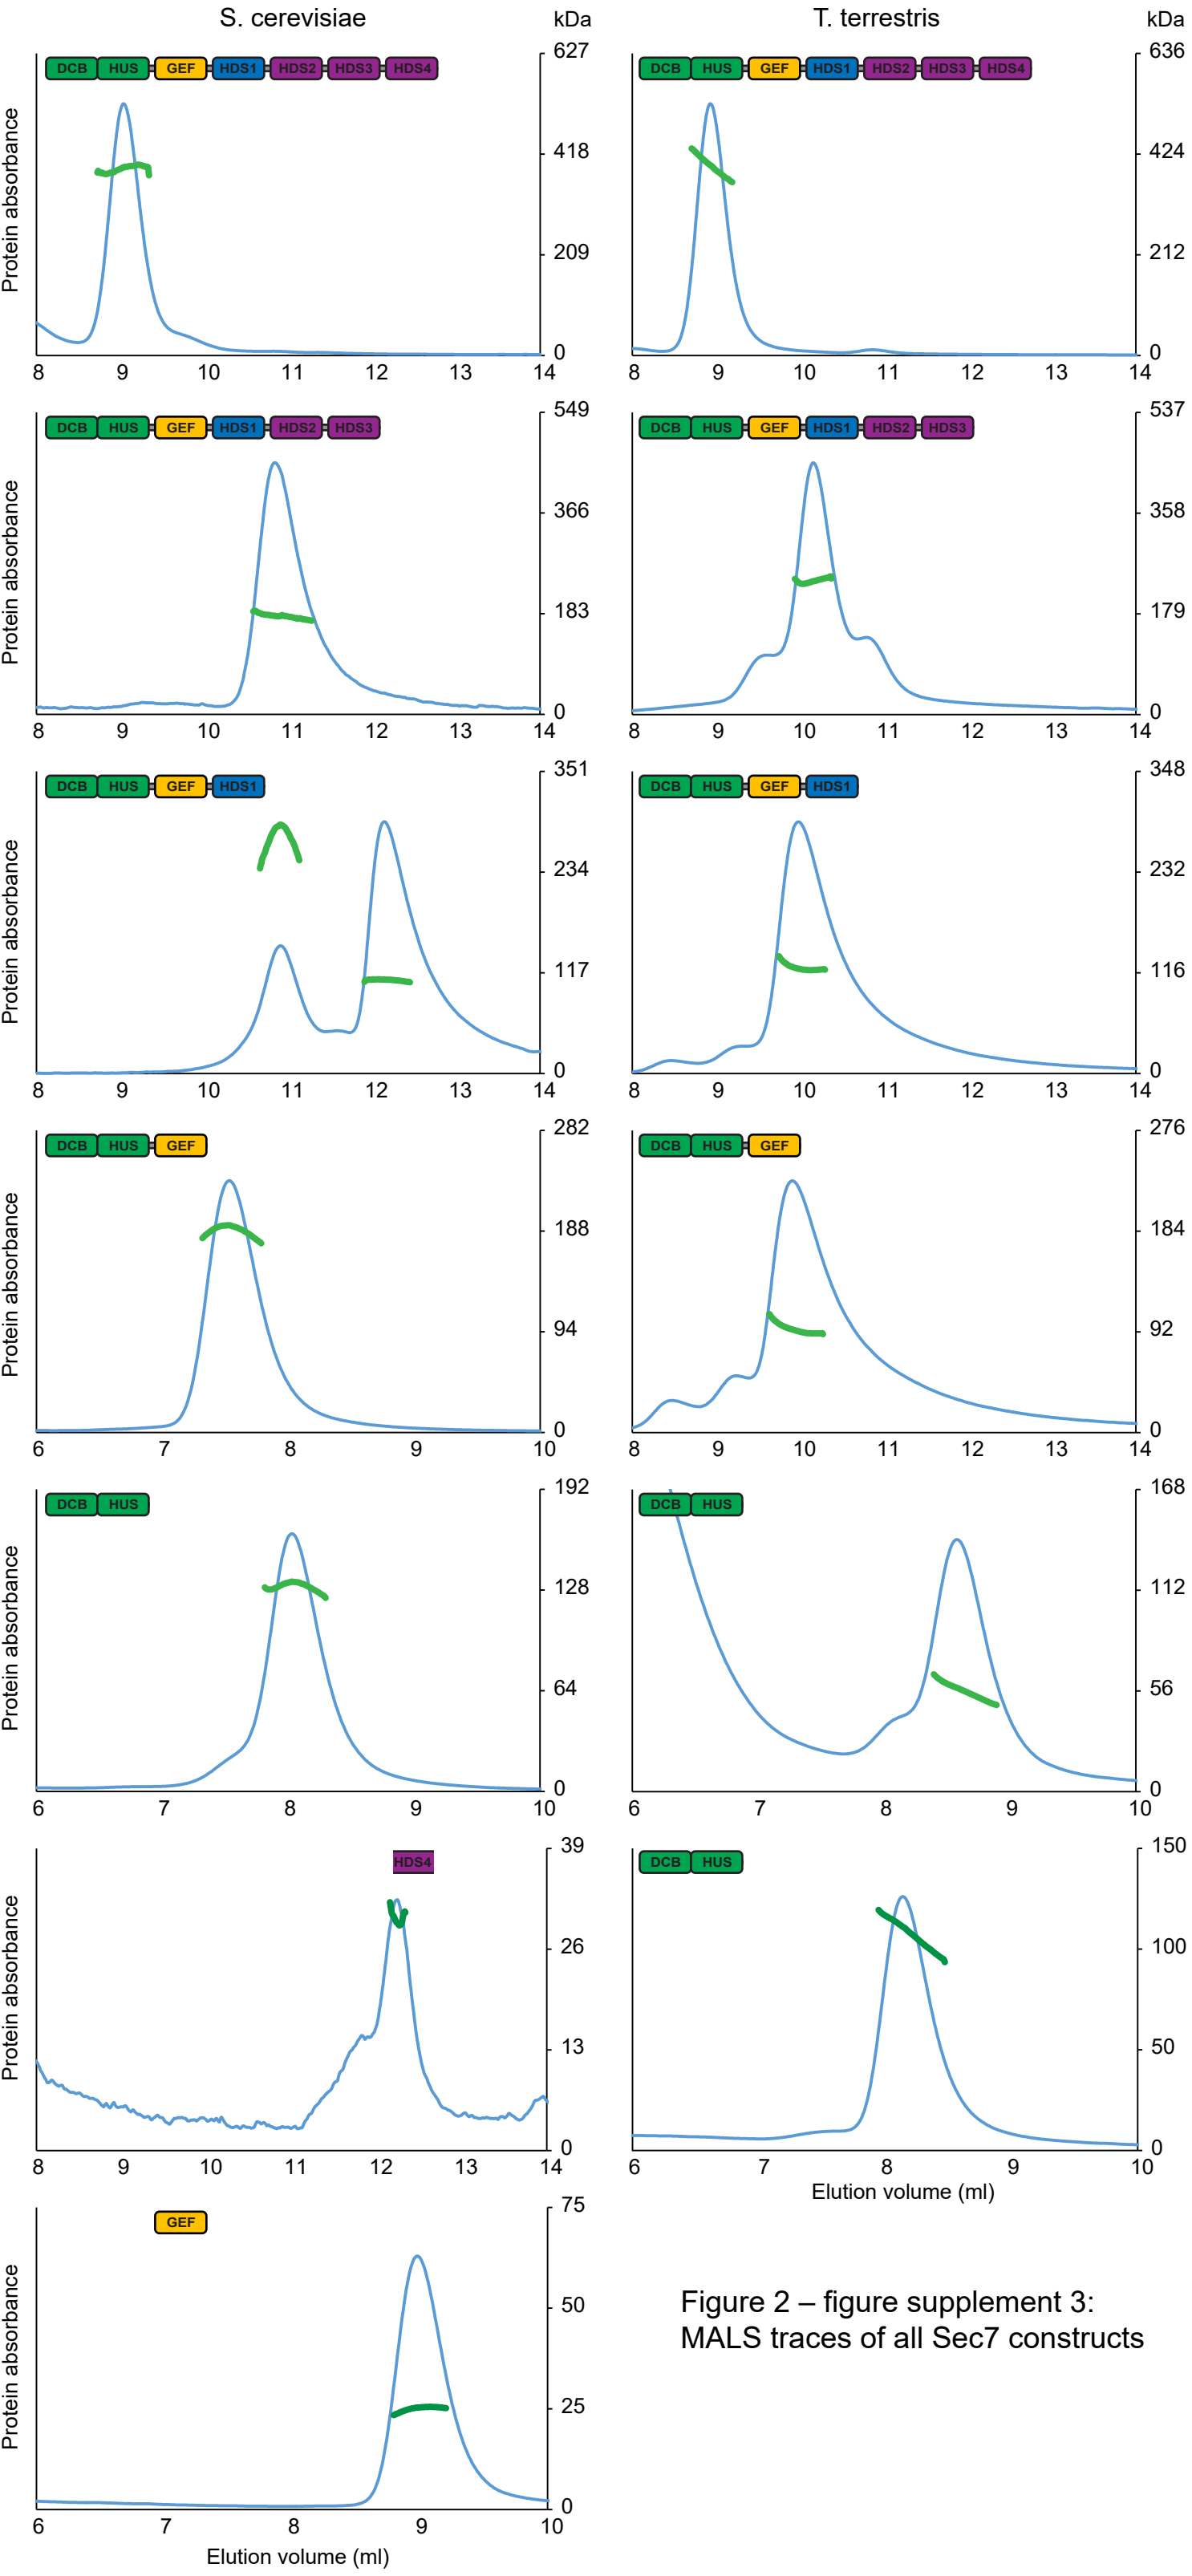

Supplement: supp [file elife-12411-supp-v1.zip]

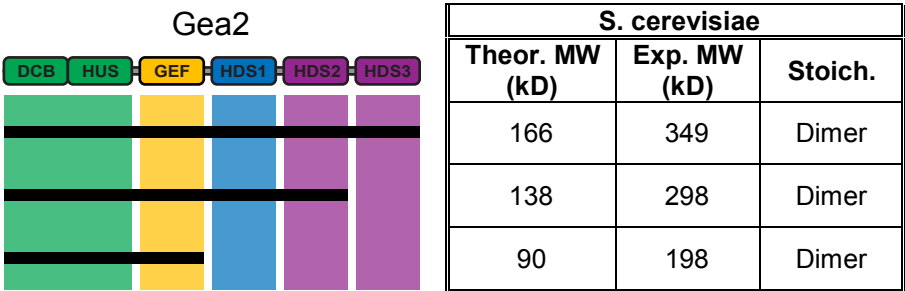

Figure 2 – figure supplement 2: MALS analysis of *S. cerevisiae* Gea2

Supplement: supp [file elife-12411-supp-v1.zip]
